# Supplementary material
Source: publisher site journal article supplement (https://www.dovepress.com/get_supplementary_file.php?f=263655.docx)
Supplement: Supplementary file 1 [file get_supplementary_file.php]

The search strategies and inclusion/exclusion criteria for circRNA research in the OSCC field as follows.

***(1) Enter the following search terms in PubMed：***

*("circular rna"[Title/Abstract] OR "circRNA"[Title/Abstract]) AND (("OSCC"[Title/Abstract] OR "oral squamous cell carcinoma"[Title/Abstract]) OR "oral cancer"[Title/Abstract])*

***(2) Exclusion criteria:***

*1) Non-SCI articles: exclude 3 articles.*

*2) Articles with low relevance: After reading these articles carefully, we excluded 6 articles with poor correlation with OSCC or circRNA.*

*3) Review articles: exclude 3 articles.*


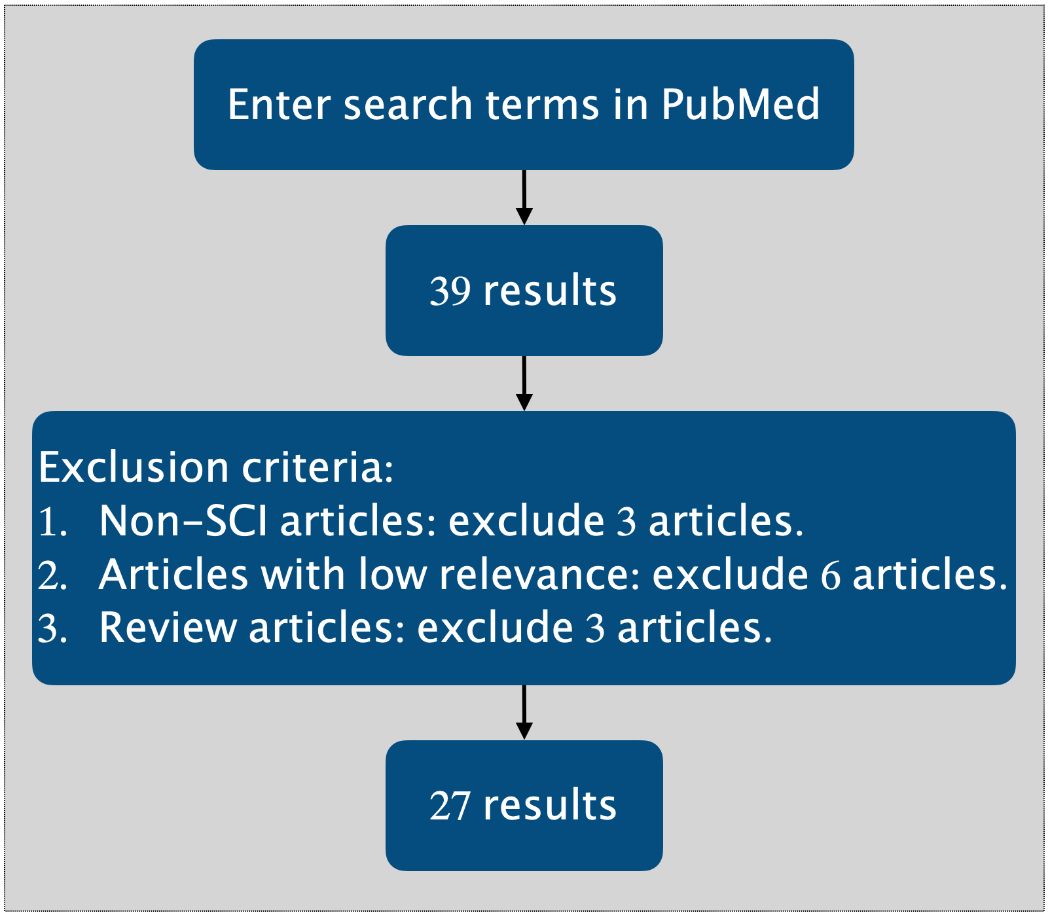


**Supplementary Figure 1 Search strategy of journal identification in the present review**
